# Supplementary material for: Maternal Dietary Docosahexaenoic Acid Alters Lipid Peroxidation Products and (n-3)/(n-6) Fatty Acid Balance in Offspring Mice
Source: PubMed Central journal article supplement (PMC6468482; doi:10.3390/metabo9030040), 2019-03-01
Supplement: metabolites-09-00040-s001.pdf [file metabolites-09-00040-s001.pdf]

**SUPPLEMENTAL INFORMATION:**

*Article*

**Maternal dietary docosahexaenoic acid alters lipid peroxidation products and (n-3)/(n-6) fatty acid balance in offspring mice**

**Bo Yang <sup>1</sup>, Runting Li <sup>2</sup>, Taeseon Woo <sup>3</sup>, Jimmy D. Browning Jr. <sup>4</sup>, Hailong Song <sup>5</sup>, Zezong Gu <sup>5</sup>, Jiankun Cui <sup>5</sup>, James C. Lee <sup>6</sup>, Kevin L. Fritsche <sup>4</sup>, David Q. Beversdorf <sup>3</sup>, Grace Y. Sun <sup>2</sup>, and C. Michael Greenlief <sup>1,\*</sup>**

<sup>1</sup> Department of Chemistry, University of Missouri, Columbia, MO 65211, USA; BY: bykm5@mail.missouri.edu, CMG: greenliefm@missouri.edu

<sup>2</sup> Biochemistry Department, University of Missouri, Columbia, MO 65211, USA; RL: lirun@health.missouri.edu, GYS: sung@missouri.edu

<sup>3</sup> Departments of Radiology, Neurology and Psychological Sciences, and the Thompson Center, University of Missouri, Columbia, MO 65211, USA; TW: twfnf@mail.missouri.edu, DQB: beversdorfd@health.missouri.edu

<sup>4</sup> Department of Nutrition and Exercise Physiology, University of Missouri, Columbia, MO 65211, USA; JDB: browningj@missouri.edu, KLF: fritschek@missouri.edu

<sup>5</sup> Department of Pathology and Anatomical Sciences, University of Missouri, Columbia, MO 65211, USA; HS: hskk8@mail.missouri.edu, ZG: guze@health.missouri.edu, JC: cuij@health.missouri.edu

<sup>6</sup> Department of Bioengineering, University of Illinois at Chicago, Chicago, IL 60607, USA; leejam@uic.edu

\* Correspondence: greenliefm@missouri.edu; Tel.: +01-573-882-3288

**Table S1. Fatty Acid (FA) Composition of Brain (Cortex, Striatum, Hippocampus and Cerebellum) from Weaning Mice Reared by Dams Fed Control or DHA-Supplemented (1%, w/w) Diets**

| FA             | Cortex            |                   | Striatum          |                   | Hippocampus       |                   | Cerebellum        |                   |
|----------------|-------------------|-------------------|-------------------|-------------------|-------------------|-------------------|-------------------|-------------------|
|                | Control           | DHA               | Control           | DHA               | Control           | DHA               | Control           | DHA               |
| 14:0           | nd <sup>a</sup>   | nd                | nd                | nd                | nd                | nd                | nd                | nd                |
| 16:0           | 29.4 ± 0.3        | 29.6 ± 0.2        | 26.4 ± 0.6        | 26.1 ± 0.9        | 25.6 ± 0.7        | 25.6 ± 0.7        | 21.8 ± 0.1        | 22.2 ± 0.3        |
| 16:1           | 0.7 ± 0.02        | 0.7 ± 0.01        | 0.7 ± 0.01        | 0.7 ± 0.02        | 0.6 ± 0.02        | 0.6 ± 0.02        | 0.7 ± 0.02        | 0.7 ± 0.01        |
| 18:0           | 28.2 ± 0.2        | 28.6 ± 0.1        | 27.1 ± 0.5        | 27.4 ± 0.5        | 25.6 ± 0.5        | 25.5 ± 0.4        | 22.1 ± 0.2        | 22.4 ± 0.4        |
| 18:1(n-9)      | 12.7 ± 0.1        | 13.0 ± 0.1        | 16.4 ± 0.4        | 16.6 ± 0.5        | 12.7 ± 0.2        | 13.2 ± 0.2        | 18.2 ± 0.2        | 18.7 ± 0.2        |
| 18:1(n-7)      | 3.2 ± 0.02        | 3.0 ± 0.02        | 4.0 ± 0.1         | 3.7 ± 0.2         | 3.0 ± 0.04        | 2.8 ± 0.03        | 4.5 ± 0.03        | 4.3 ± 0.06        |
| 18:2(n-6)      | 0.9 ± 0.02        | 1.1 ± 0.01        | 0.9 ± 0.03        | 1.1 ± 0.05        | 0.8 ± 0.02        | 1.0 ± 0.02        | 1.4 ± 0.03        | 1.7 ± 0.03        |
| 20:3(n-6)      | <b>0.5 ± 0.02</b> | <b>1.0 ± 0.01</b> | 0.7 ± 0.04        | 1.2 ± 0.05        | 0.6 ± 0.03        | 1.1 ± 0.04        | 1.0 ± 0.01        | 1.5 ± 0.03        |
| 20:4(n-6)      | <b>10.5 ± 0.1</b> | <b>8.8 ± 0.1</b>  | <b>9.6 ± 0.1</b>  | <b>8.2 ± 0.4</b>  | <b>13.1 ± 0.4</b> | <b>11.1 ± 0.3</b> | <b>9.9 ± 0.2</b>  | <b>7.4 ± 0.1</b>  |
| 20:5(n-3)      | nd                | nd                | nd                | nd                | nd                | 0.2 ± 0.02        | nd                | 0.2 ± 0.01        |
| 22:4(n-6)      | <b>2.2 ± 0.04</b> | <b>1.2 ± 0.02</b> | <b>2.6 ± 0.1</b>  | <b>1.6 ± 0.1</b>  | 2.6 ± 0.06        | 1.5 ± 0.06        | <b>2.7 ± 0.08</b> | <b>1.4 ± 0.06</b> |
| 22:5(n-6)      | <b>0.6 ± 0.02</b> | <b>nd</b>         | 0.6 ± 0.02        | nd                | 0.8 ± 0.03        | 0.1 ± 0.03        | 0.4 ± 0.02        | nd                |
| 22:5(n-3)      | 0.3 ± 0.03        | 0.4 ± 0.03        | 0.9 ± 0.06        | 0.9 ± 0.1         | 0.4 ± 0.05        | 0.4 ± 0.02        | 1.8 ± 0.06        | 2.1 ± 0.1         |
| 22:6(n-3)      | <b>10.7 ± 0.4</b> | <b>12.7 ± 0.2</b> | <b>10.1 ± 0.4</b> | <b>12.3 ± 0.8</b> | <b>14.2 ± 0.5</b> | <b>16.9 ± 0.8</b> | <b>15.6 ± 0.2</b> | <b>17.6 ± 0.3</b> |
| n-3: n-6 ratio | 0.75              | 1.08              | 0.76              | 1.09              | 0.82              | 1.18              | 1.13              | 1.66              |

<sup>a</sup>“nd”, not detected.

Values shown in italics and bold for FA compositions are significantly different between the control and DHA group.

**Table S2. Fatty Acid (FA) Composition of Plasma and Heart from Weaning Mice Reared by Dams Fed Control or DHA-Supplemented (1%, w/w) Diets**

| FA             | Plasma            |                   | Heart             |                   |
|----------------|-------------------|-------------------|-------------------|-------------------|
|                | Control           | DHA               | Control           | DHA               |
| 14:0           | 3.5 ± 0.7         | 3.5 ± 0.4         | nd                | nd                |
| 16:0           | 40.0 ± 0.7        | 38.3 ± 1.6        | <b>20.4 ± 0.3</b> | <b>22.6 ± 0.3</b> |
| 16:1           | 0.9 ± 0.1         | 0.8 ± 0.1         | 0.4 ± 0.05        | 0.3 ± 0.05        |
| 18:0           | 20.9 ± 0.6        | 18.7 ± 0.6        | <b>25.0 ± 0.6</b> | <b>23.2 ± 0.4</b> |
| 18:1 (n-9)     | <b>11.9 ± 1.1</b> | <b>6.9 ± 0.2</b>  | <b>10.9 ± 0.4</b> | <b>7.3 ± 0.2</b>  |
| 18:1 (n-7)     | 1.4 ± 0.1         | 0.8 ± 0.04        | 3.2 ± 0.1         | 3.2 ± 0.05        |
| 18:2 (n-6)     | <b>14.6 ± 0.8</b> | <b>19.3 ± 1.3</b> | <b>15.2 ± 0.3</b> | <b>11.2 ± 0.3</b> |
| 20:3 (n-6)     | 0.7 ± 0.07        | 1.1 ± 0.1         | 1.9 ± 0.1         | 1.9 ± 0.04        |
| 20:4 (n-6)     | 4.3 ± 0.7         | 2.3 ± 0.3         | <b>10.5 ± 0.3</b> | <b>3.3 ± 0.1</b>  |
| 20:5 (n-3)     | 0.2 ± 0.05        | 0.2 ± 0.1         | 0.3 ± 0.1         | 0.4 ± 0.2         |
| 22:4 (n-6)     | 0.3 ± 0.01        | 0.9 ± 0.05        | <b>2.1 ± 0.1</b>  | <b>0.1 ± 0.05</b> |
| 22:5 (n-6)     | 0.2 ± 0.01        | nd <sup>a</sup>   | <b>1.4 ± 0.04</b> | <b>nd</b>         |
| 22:5 (n-3)     | 0.4 ± 0.03        | 0.5 ± 0.02        | 1.3 ± 0.1         | 0.6 ± 0.05        |
| 22:6 (n-3)     | <b>0.8 ± 0.2</b>  | <b>6.5 ± 0.7</b>  | <b>7.5 ± 0.3</b>  | <b>25.8 ± 0.6</b> |
| n-3: n-6 ratio | 0.07              | 0.31              | <b>0.29</b>       | <b>1.62</b>       |

<sup>a</sup>“nd”, not detected.

Values shown in italics and bold for FA compositions are significantly different between the control and DHA group.

**Table S3. Experimental Mouse Diets**

| Ingredients (g / kg)                           | Control diet | 1% DHA diet |
|------------------------------------------------|--------------|-------------|
| cornstarch                                     | 397          | 397         |
| casein                                         | 200          | 200         |
| dextrin (dyetrose)                             | 132          | 132         |
| sucrose                                        | 100          | 100         |
| fiber (alpha-cellulose)                        | 50           | 50          |
| mineral mix (AIN-93)                           | 35           | 35          |
| vitamin mix (AIN-93G)                          | 10           | 10          |
| L-cystine                                      | 3            | 3           |
| choline bitartrate                             | 2.5          | 2.5         |
| soybean oil                                    | 50           | 0           |
| corn oil                                       | 20           | 0           |
| safflower oil                                  | 0            | 45          |
| DHASCO algal oil <sup>a</sup>                  | 0            | 25          |
| t-butylhydroquinone (a synthetic anti-oxidant) | 0.014        | 0.014       |
| total                                          | 1000         | 1000        |

<sup>a</sup>a gift from DSM Nutritional Products, Columbia, MD, USA

**Table S4. Fatty Acid Composition of Diets**

|              | Control diet     | 1% DHA diet |
|--------------|------------------|-------------|
| 16:0         | 0.8 <sup>a</sup> | 0.4         |
| 18:0         | 0.2              | 0.2         |
| 18:1         | 1.8              | 1.0         |
| 18:2n6       | 3.9              | 4.0         |
| 18:3n3       | 0.4              | 0.1         |
| 20:5n3       | nd <sup>b</sup>  | 0.1         |
| 22:5n3       | nd               | 0.3         |
| 22:6n3 (DHA) | nd               | 1.0         |

<sup>a</sup> Values represent g/ 100g of diet.

<sup>b</sup> nd: not detected.

**Table S5. Method Validation Parameters for Detection of 4-HHE in Plasma, Heart and Brain**

**Tissue**

|                | Linearity | Matrix Effect | Phree Recovery | Sep-Pak Recovery | Intra-day       |                              | Inter-day       |                              |
|----------------|-----------|---------------|----------------|------------------|-----------------|------------------------------|-----------------|------------------------------|
|                |           |               |                |                  | Accuracy (bias) | Precision (CV <sup>a</sup> ) | Accuracy (bias) | Precision (CV <sup>a</sup> ) |
| Plasma (n = 3) | 0.9986    | 100.7%        | 109.9%         | 100.1%           | 9.7%            | 0.8%                         | 11.9%           | 0.9%                         |
| Heart (n =3)   | 0.9995    | 89.6%         | 91.2%          | 99.8%            | 6.5%            | 0.6%                         | 7.2%            | 0.7%                         |
| Brain (n = 3)  | 0.9969    | 98.1%         | 95.3%          | 110.1%           | 7.4%            | 1.8%                         | 13.6%           | 2.1%                         |

<sup>a</sup> CV: coefficient of variance. “n” represents the number of a given biological sample and triplicate analyses were obtained for each biological sample.

**Table S6. Method Validation Parameters for Detection of 4-HNE in Plasma, Heart and Brain****Tissue**

|                | Linearity | Matrix Effect | Phree Recovery | Sep-Pak Recovery | Intra-day       |                              | Inter-day       |                              |
|----------------|-----------|---------------|----------------|------------------|-----------------|------------------------------|-----------------|------------------------------|
|                |           |               |                |                  | Accuracy (bias) | Precision (CV <sup>a</sup> ) | Accuracy (bias) | Precision (CV <sup>a</sup> ) |
| Plasma (n = 3) | 0.9993    | 100.7%        | 88.4%          | 95.2%            | 8.6%            | 1.7%                         | 14.3%           | 2.2%                         |
| Heart (n = 3)  | 0.9967    | 89.6%         | 89.9%          | 94.9%            | 5.6%            | 1.4%                         | 10.8%           | 3.0%                         |
| Brain (n = 3)  | 0.9932    | 98.1%         | 85.6%          | 111.7%           | 6.6%            | 2.0%                         | 12.7%           | 6.4%                         |

<sup>a</sup> CV: coefficient of variance. “n” represents the number of a given biological sample and triplicate analyses were obtained for each biological sample.
